# Supplementary material for: Increased virulence of the oral microbiome in oral squamous cell carcinoma revealed by metatranscriptome analyses
Source: PubMed Central journal article supplement (PMC6232154; doi:10.1038/s41368-018-0037-7), 2018-11-12
Supplement: 41368_2018_37_MOESM3_ESM.pdf [file 41368_2018_37_MOESM3_ESM.pdf]

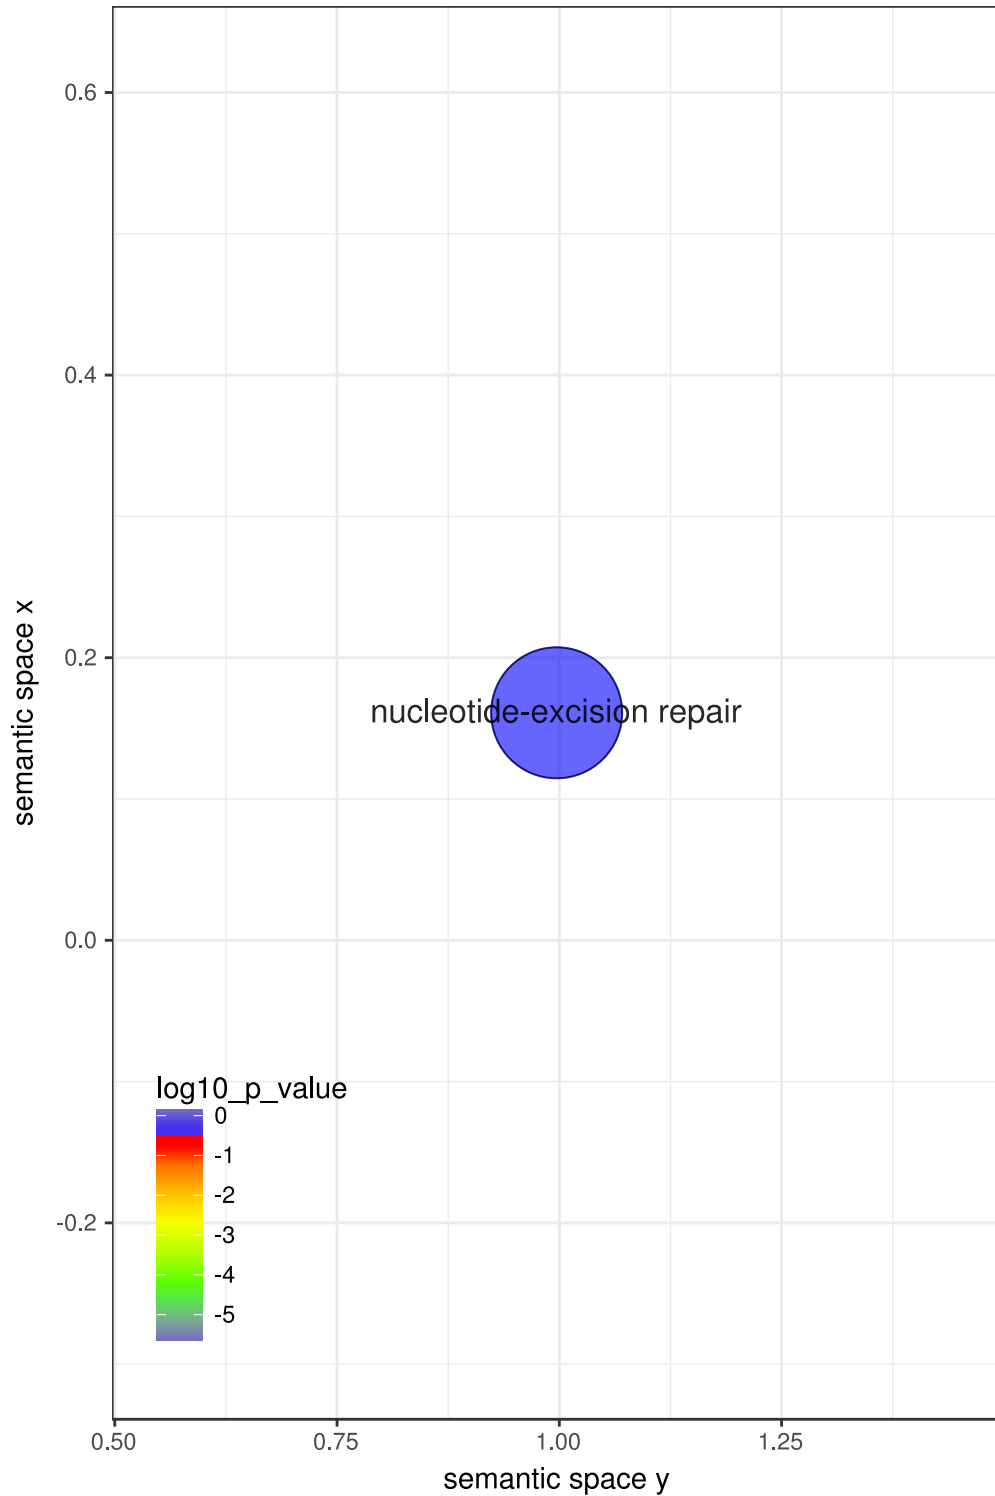

**Supplementary Figure 2. GO enrichment analysis for the metatranscriptome profiles of the oral microbiome associated with cancer status; Under-represented Biologic processes.**

Enriched terms obtained using Goseq were summarized and visualized as a scatter plot using REVIGO.

Summarized GO terms in PT tumor [tumor site] vs. CT tumor-matched site [control tumor].

Circle size is proportional to the frequency of the GO term, while color indicates the log<sub>10</sub> P value (red higher, green lower).
