# Supplementary material for: Increased virulence of the oral microbiome in oral squamous cell carcinoma revealed by metatranscriptome analyses
Source: PubMed Central journal article supplement (PMC6232154; doi:10.1038/s41368-018-0037-7), 2018-11-12
Supplement: 41368_2018_37_MOESM4_ESM.pdf [file 41368_2018_37_MOESM4_ESM.pdf]

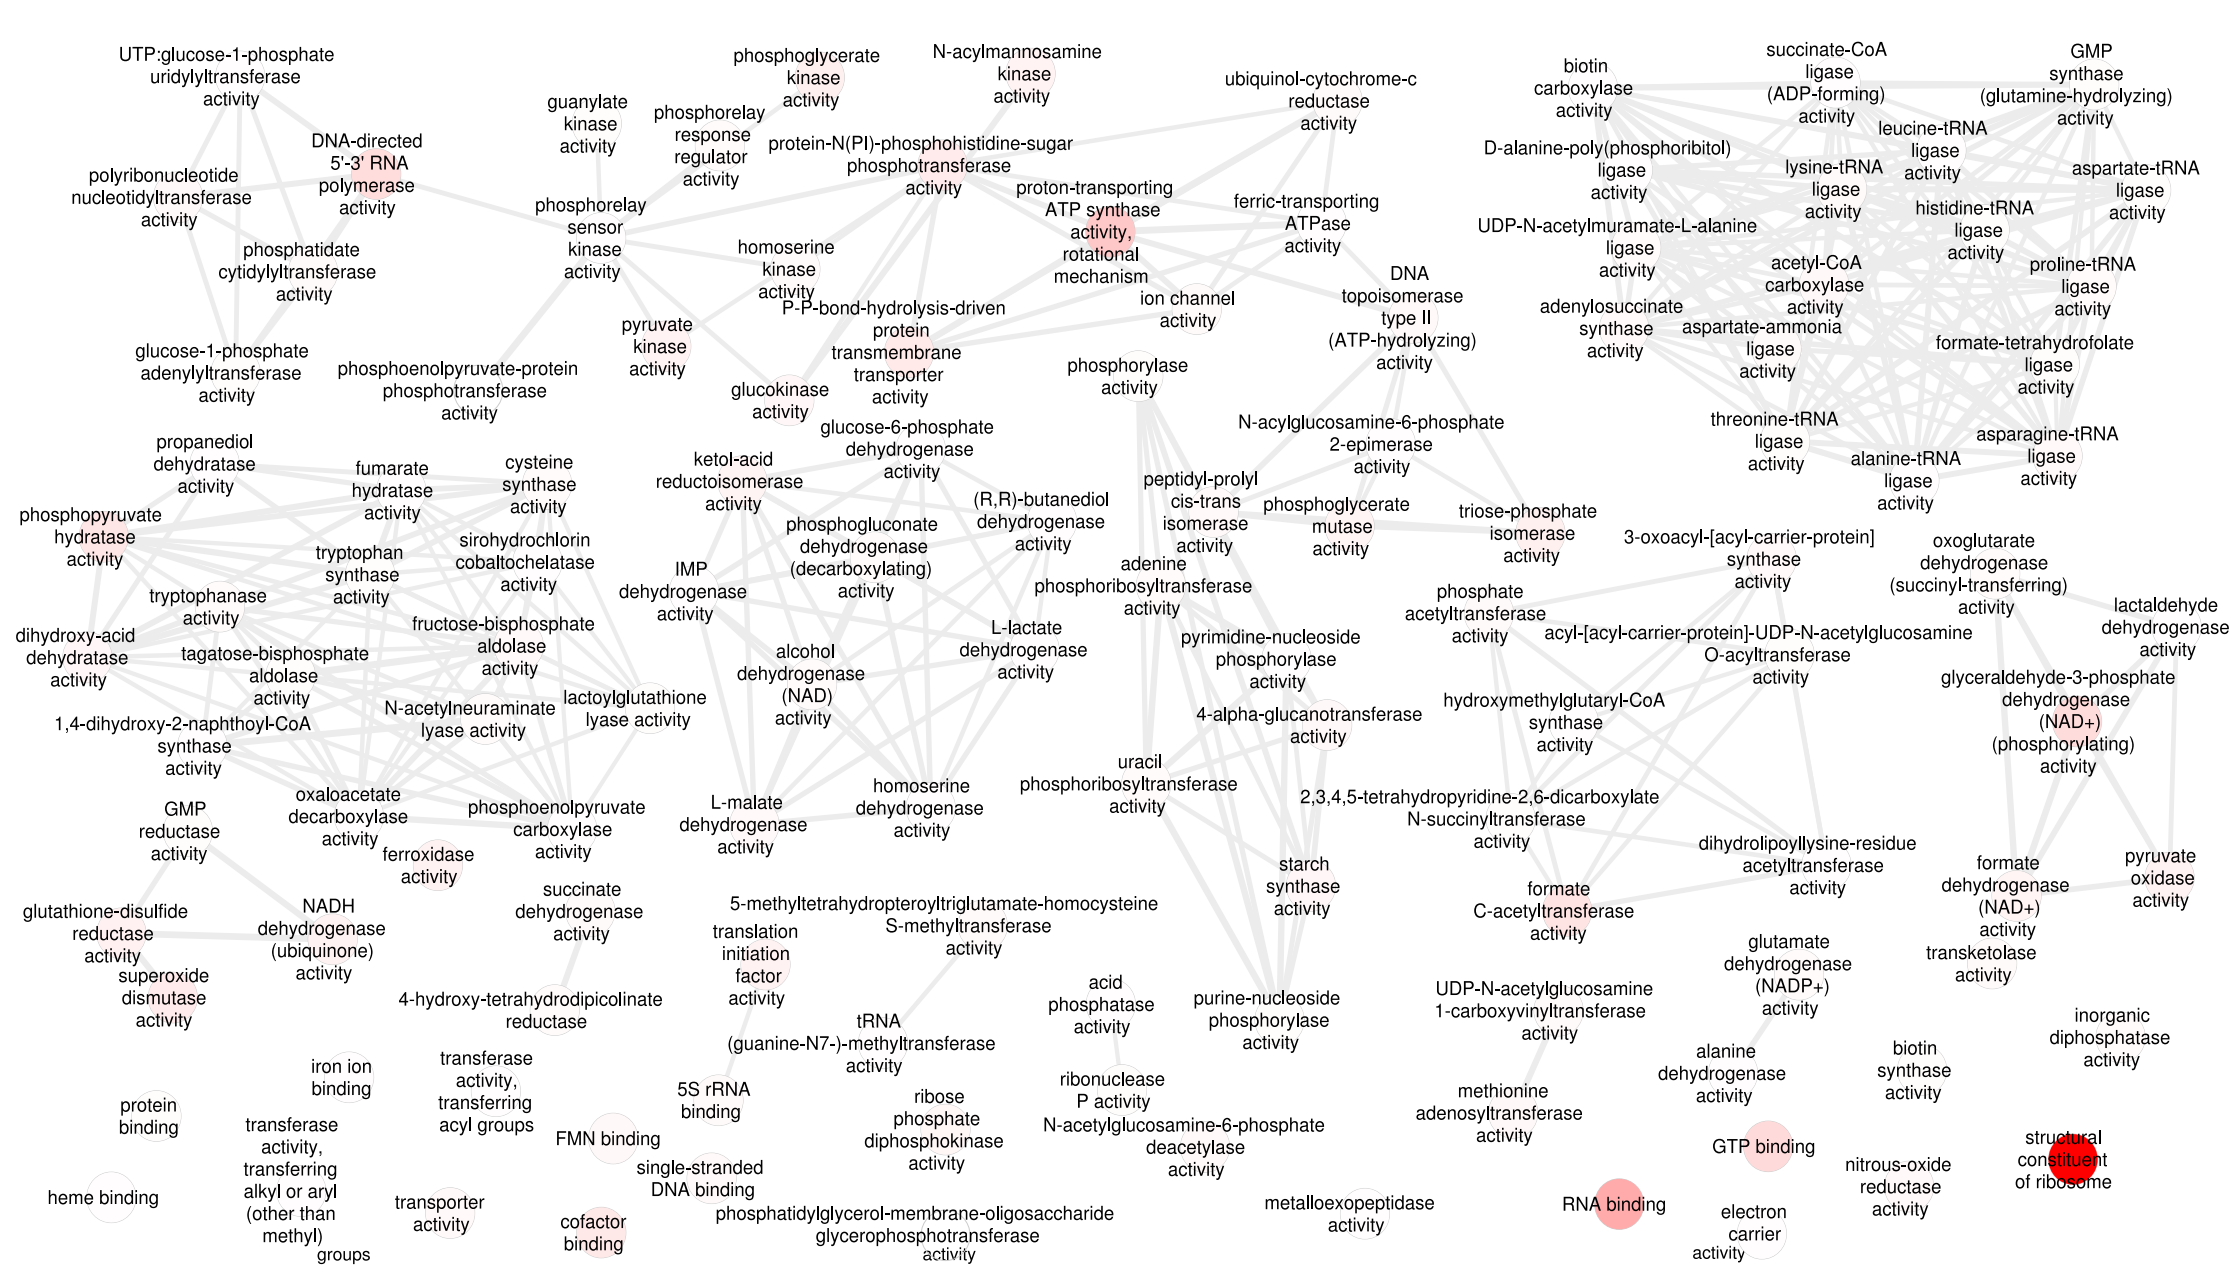

**Supplementary Figure 3. GO enrichment analysis for the metatranscriptome profiles of the oral microbiome associated with cancer status. Over-represented Molecular Functions.** Enriched terms obtained using GOseq were summarized and visualized as a network using REVIGO. Summarized GO terms in healthy control matching tumor sites vs. OSCC tumor sites. Bubble color indicates the user-provided p-value (darker red is closer to 0). Highly similar GO terms are linked by edges in the graph.
