# Supplementary material for: Increased virulence of the oral microbiome in oral squamous cell carcinoma revealed by metatranscriptome analyses
Source: PubMed Central journal article supplement (PMC6232154; doi:10.1038/s41368-018-0037-7), 2018-11-12
Supplement: 41368_2018_37_MOESM5_ESM.pdf [file 41368_2018_37_MOESM5_ESM.pdf]

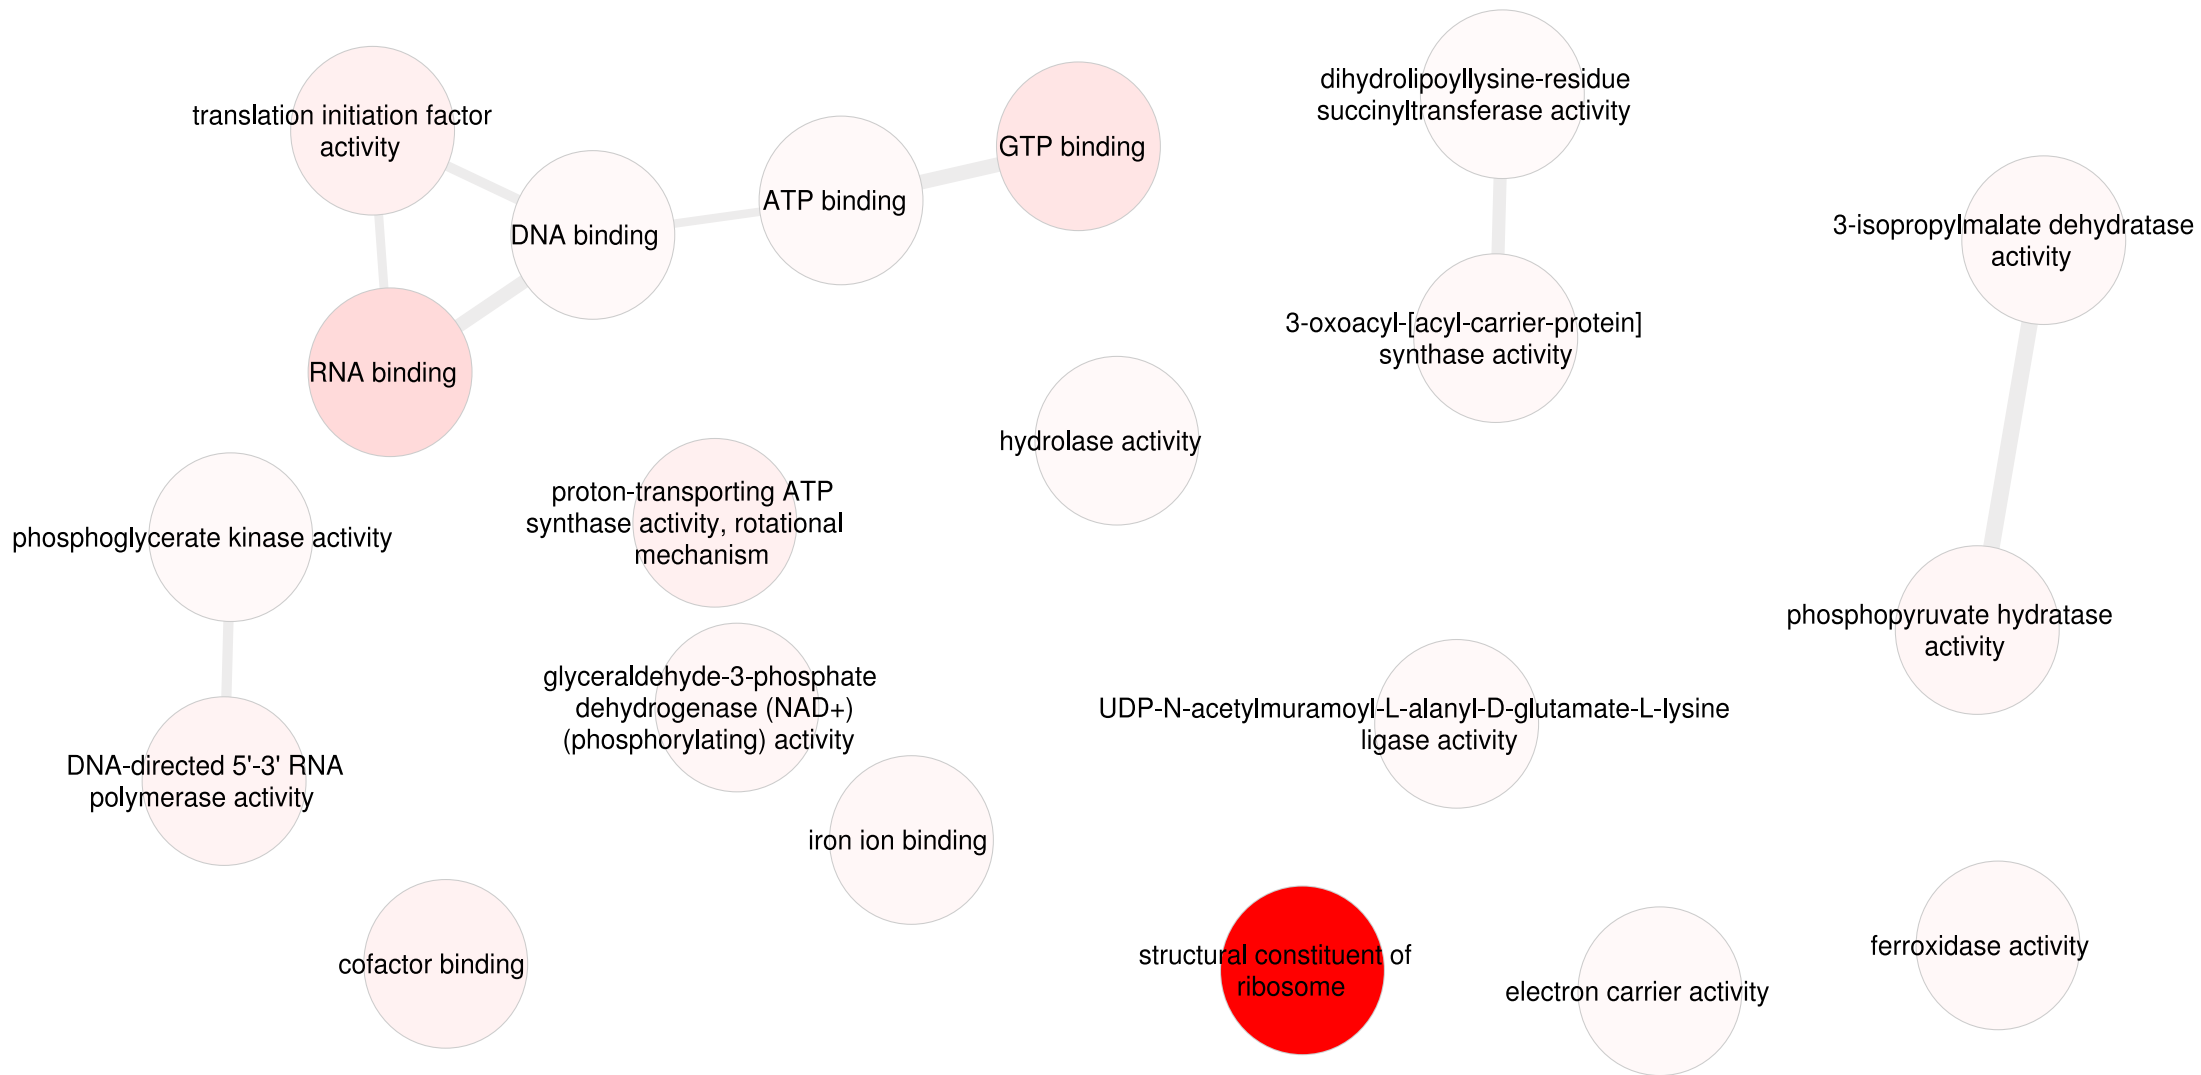

**Supplementary Figure 4. GO enrichment analysis for the metatranscriptome profiles of the oral microbiome associated with cancer status.**

Over-represented Molecular Functions. Enriched terms obtained using Goseq were summarized and visualized as a network using REVIGO.

Summarized GO terms OSCC tumor-adjacent vs. OSCC tumor sites.

Bubble color indicates the user-provided p-value (darker red is closer to 0). Highly similar GO terms are linked by edges in the graph.
