# Supplementary material for: Increased virulence of the oral microbiome in oral squamous cell carcinoma revealed by metatranscriptome analyses
Source: PubMed Central journal article supplement (PMC6232154; doi:10.1038/s41368-018-0037-7), 2018-11-12
Supplement: 41368_2018_37_MOESM9_ESM.pdf [file 41368_2018_37_MOESM9_ESM.pdf]

**Supplementary Table 2.** Cohort characteristics, including disease status and site sampled. Number of total sequences and unique mapped reads to the oral microbiome genome database.

| <b>Subject</b> | <b>Disease status</b> | <b>Sample site</b>   | <b>Number of sequences</b> | <b>Number of mapped reads</b> |
|----------------|-----------------------|----------------------|----------------------------|-------------------------------|
| Patient 1      | Buccal cancer         | Tumor site           | 48,833,407                 | 36,617,557                    |
|                |                       | Buccal site no tumor | 265,199,761                | 118,421,522                   |
| Patient 2      | Floor of mouth cancer | Tumor site           | 33,933,548                 | 19,080,415                    |
|                |                       | Buccal site no tumor | 14,847,961                 | 8,588,265                     |
| Patient 3      | Floor of mouth cancer | Tumor site           | 51,298,649                 | 29,268,699                    |
|                |                       | Buccal site no tumor | 51,065,365                 | 30,700,991                    |
| Patient 4      | Buccal cancer         | Tumor site           | 6,996,798                  | 3,191,196                     |
|                |                       | Buccal site no tumor | 40,404,375                 | 10,744,928                    |
| Control 1      | Healthy               | Control Tumor site   | 23,310,479                 | 21,732,254                    |
|                |                       | Healthy buccal       | 44,487,026                 | 40,742,641                    |
| Control 2      | Healthy               | Control Tumor site   | 13,547,239                 | 8,798,109                     |
|                |                       | Healthy buccal       | 6,806,791                  | 3,172,602                     |
| Control 3      | Healthy               | Control Tumor site   | 5,423,938                  | 4,984,258                     |
|                |                       | Healthy buccal       | 25,599,665                 | 23,985,334                    |
| Control 4      | Healthy               | Control Tumor site   | 14,811,504                 | 11,888,368                    |
